# Supplementary material
Source: Springer Nature journal article supplement (https://www.springermedizin.de/resource/supplementary/12913_2008_795_MOESM4_ESM.pdf/9535598)
Supplement: MOESM4 [file 9535598]

654 potentially relevant RCTs identified in: PubMed, Cinahl, Web of Science, Embase, Cochrane Register of Controlled Trials, and by snowball search.

629 promptly rejected by "scanning" headings or abstract.

25 RCTs retrieved for scrutiny by MT, PV and CW.

\*

Not CM: 15

Not cancer: 1

Not RCT: 2

Other reasons: 2<sup>#</sup>

Seven RCTs included in the review, i.e. fulfilling inclusion and exclusion criteria.
